# Supplementary material for: Country and health expenditure are major predictors of withholding anticoagulation in atrial fibrillation patients at high risk of stroke
Source: PubMed Central journal article supplement — Open Heart. 2023 Dec 13;10(2):e002506. doi: 10.1136/openhrt-2023-002506 (PMC10729201; doi:10.1136/openhrt-2023-002506), 2023-12-13
Supplement: openhrt-2023-002506supp001.pdf [file openhrt-2023-002506supp001.pdf]

**SUPPLEMENTARY MATERIAL**

**Figure S1. Flowchart for the selection of the study population.** Of 52057 cases in the GARFIELD-AF registry, after exclusions and completion of follow-up, 28290 patients had received oral anticoagulation (OAC), 12126 no OAC at baseline.

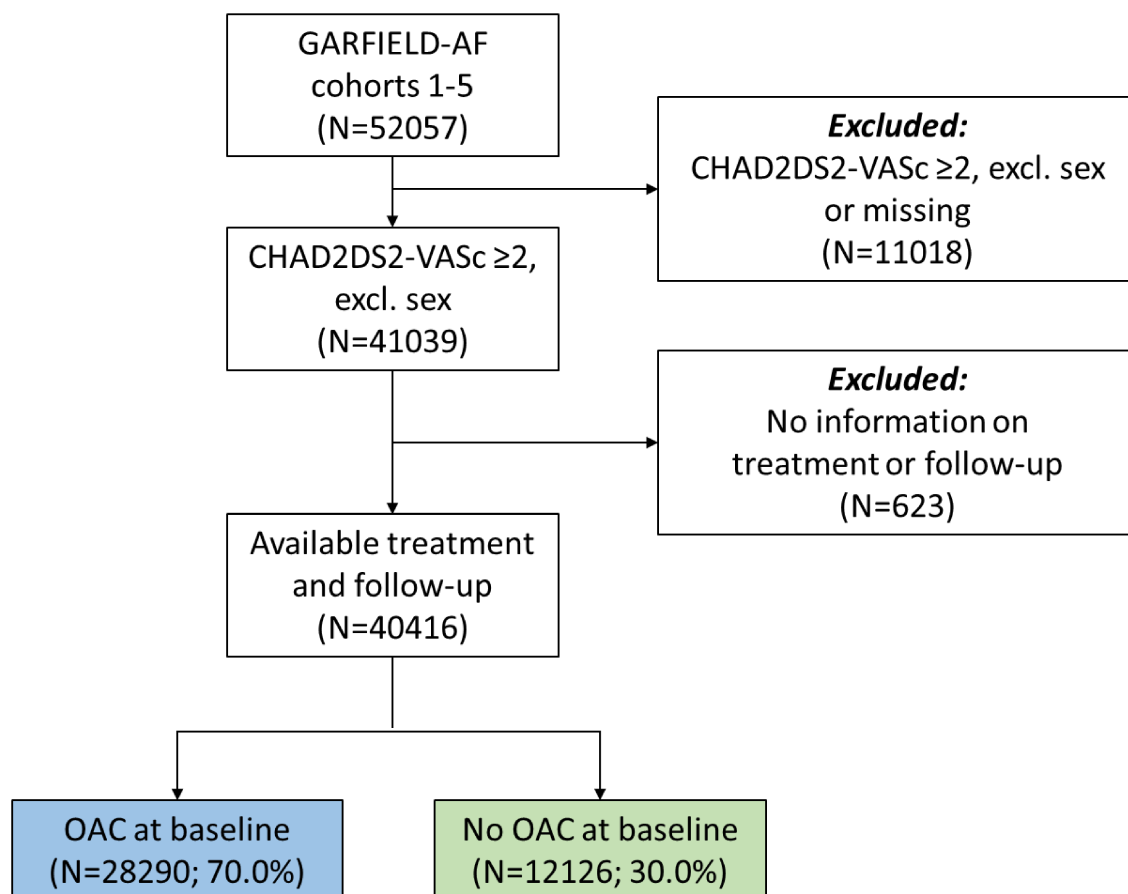

**Figure S2.** Components of the model predicting withholding of OAC. Associations reported refer to the model with the inclusion of health expenditure per capita information (Model 3)

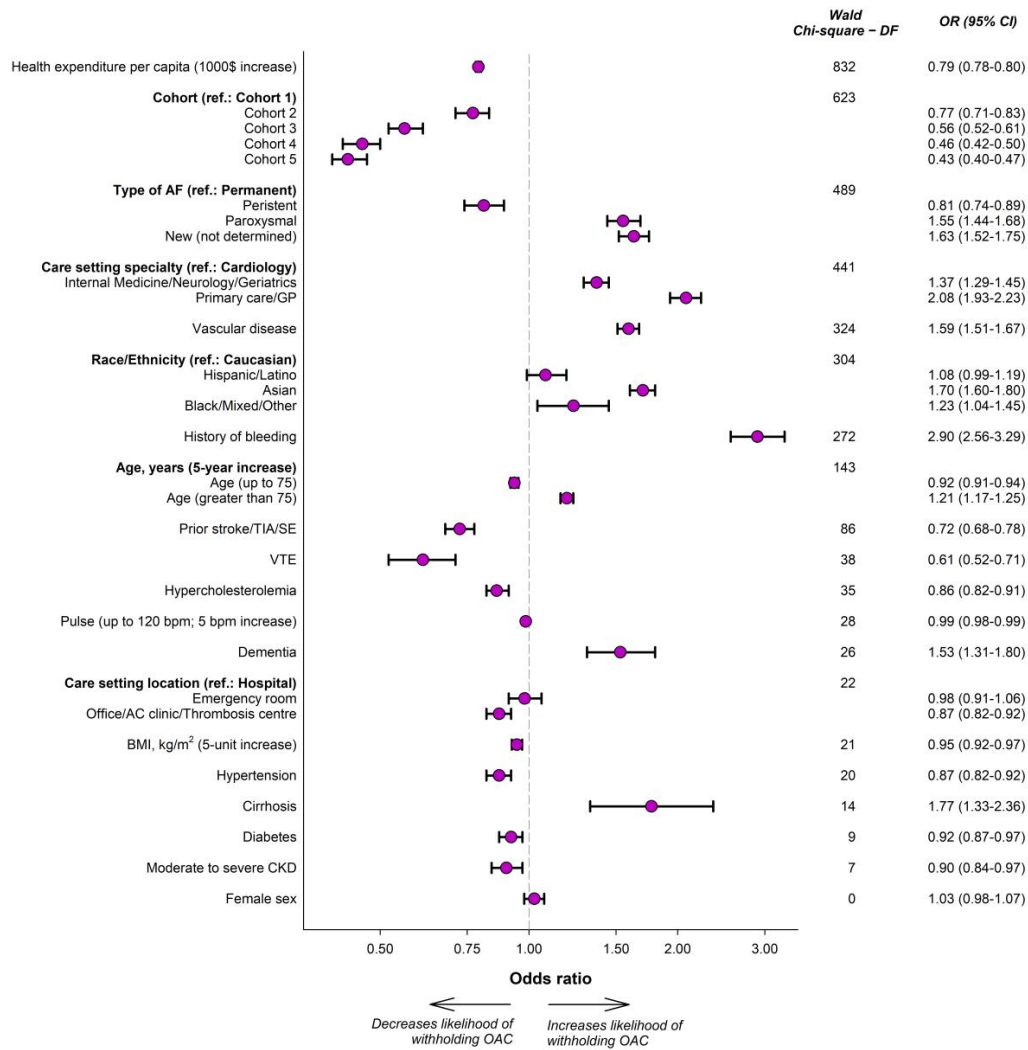

**Figure S3. Relationship between country averages of health expenditure per person and OAC use (proportion of OAC-treated high-risk patients).** Health expenditure, PPP (current international \$) represents the country average between 2010-2016. Axes scales intersect at the averages across all countries and cohorts.

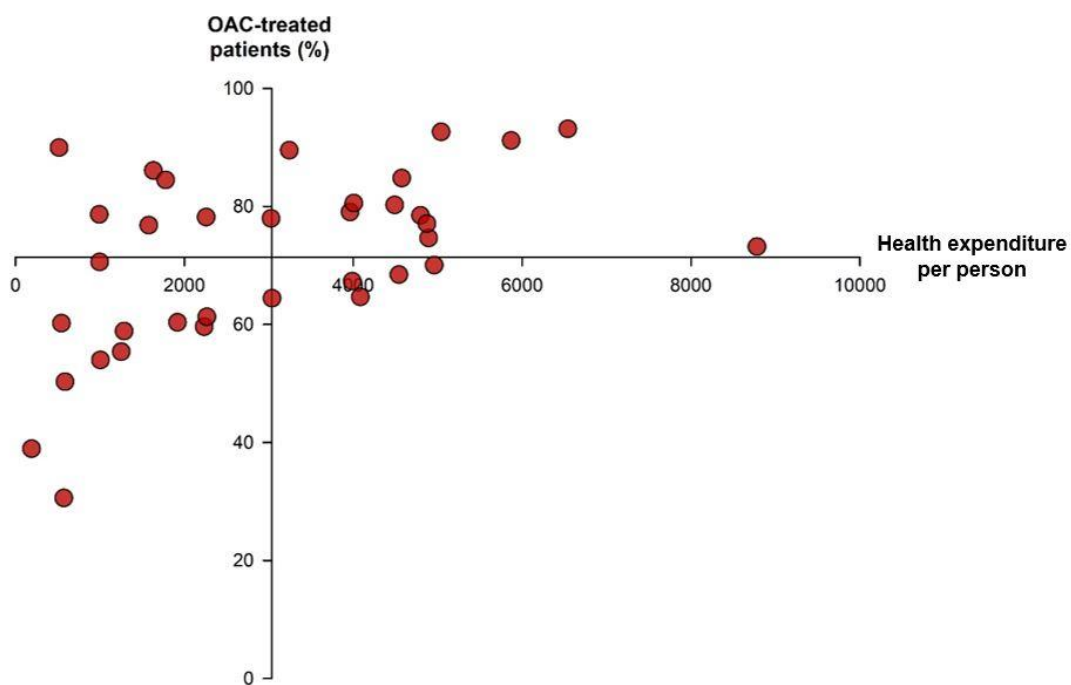

**Table S1. List of potential predictors for the OAC withholding models.** Variables for which no association with OAC withholding was found are shown in italics.

|                                                                                                                                                                                                                                                                                                                                                                                                                                                                                                                                                                                                                                                                |                                                                                                                                                                                                                                                                                                                                                                                                                                                                                                                                                                                                                                                                                                                                                                           |
|----------------------------------------------------------------------------------------------------------------------------------------------------------------------------------------------------------------------------------------------------------------------------------------------------------------------------------------------------------------------------------------------------------------------------------------------------------------------------------------------------------------------------------------------------------------------------------------------------------------------------------------------------------------|---------------------------------------------------------------------------------------------------------------------------------------------------------------------------------------------------------------------------------------------------------------------------------------------------------------------------------------------------------------------------------------------------------------------------------------------------------------------------------------------------------------------------------------------------------------------------------------------------------------------------------------------------------------------------------------------------------------------------------------------------------------------------|
| <p><b>Demographics</b></p> <ul style="list-style-type: none"> <li>• Sex</li> <li>• Age</li> <li>• Ethnicity/Ethnicity</li> <li>• Country (only for model 2)</li> </ul> <p><b>Medical and Cardiovascular</b></p> <p><b>History</b></p> <ul style="list-style-type: none"> <li>• Hypertension</li> <li>• Diabetes</li> <li>• Moderate to severe CKD<sup>1</sup></li> <li>• History of bleeding<sup>2</sup></li> <li>• Heart failure</li> <li>• Acute coronary syndromes</li> <li>• Carotid occlusive disease</li> <li>• Venous thromboembolism</li> <li>• Vascular disease<sup>3</sup></li> <li>• Prior stroke/TIA/SE</li> <li>• Hypercholesterolemia</li> </ul> | <p><b>Lifestyle factors</b></p> <ul style="list-style-type: none"> <li>• Current smoking</li> <li>• Heavy alcohol consumption<sup>4</sup></li> </ul> <p><b>Vital signs</b></p> <ul style="list-style-type: none"> <li>• BMI (kg/m<sup>2</sup>)</li> <li>• Pulse (bpm)</li> <li>• Systolic blood pressure (mmHG)</li> <li>• Diastolic blood pressure (mmHG)</li> </ul> <p><b>Atrial fibrillation diagnosis</b></p> <ul style="list-style-type: none"> <li>• Type of atrial fibrillation<sup>5</sup></li> </ul> <p><b>Care setting at diagnosis</b></p> <ul style="list-style-type: none"> <li>• Care setting specialty</li> <li>• Care setting location</li> </ul> <p><b>Other</b></p> <ul style="list-style-type: none"> <li>• Cohort of enrolment<sup>6</sup></li> </ul> |
|----------------------------------------------------------------------------------------------------------------------------------------------------------------------------------------------------------------------------------------------------------------------------------------------------------------------------------------------------------------------------------------------------------------------------------------------------------------------------------------------------------------------------------------------------------------------------------------------------------------------------------------------------------------|---------------------------------------------------------------------------------------------------------------------------------------------------------------------------------------------------------------------------------------------------------------------------------------------------------------------------------------------------------------------------------------------------------------------------------------------------------------------------------------------------------------------------------------------------------------------------------------------------------------------------------------------------------------------------------------------------------------------------------------------------------------------------|

- |                                                                                                                                   |                                                                                                                                      |
|-----------------------------------------------------------------------------------------------------------------------------------|--------------------------------------------------------------------------------------------------------------------------------------|
| <ul style="list-style-type: none"><li>• Cirrhosis</li><li>• Hyperthyroidism</li><li>• Hypothyroidism</li><li>• Dementia</li></ul> | <ul style="list-style-type: none"><li>• Health expenditure per person, PPP, in current international \$ (only for model 3)</li></ul> |
|-----------------------------------------------------------------------------------------------------------------------------------|--------------------------------------------------------------------------------------------------------------------------------------|

<sup>1</sup> Defined as CKD stage III to V

<sup>2</sup> Defined as a previous occurrence of bleeding of any severity and type

<sup>3</sup> Defined as peripheral vascular disease and/or coronary artery disease

<sup>4</sup> Investigator-defined

<sup>5</sup> Classified as paroxysmal, persistent, permanent or unclassified

<sup>6</sup> Cohort 1 (period of enrolment 2010-2011), Cohort 2 (2011-2013), Cohort 3 (2013-2014), Cohort 4 (2014-2015), Cohort 5 (2015-2016)

BMI: body mass index, CKD: chronic kidney disease, OAC: oral anticoagulation, SE: systemic embolism, TIA: transient ischemic attack, PPP: purchasing power parity

**Table S2. Baseline characteristics among patients treated with OAC at baseline by baseline OAC treatment<sup>1</sup>**

| Baseline characteristics                        | OAC treatment          |                     | P-value <sup>2</sup> |
|-------------------------------------------------|------------------------|---------------------|----------------------|
|                                                 | VKA<br>(n = 16939)     | NOAC<br>(N = 11351) |                      |
| Sex, n (col %)                                  |                        |                     |                      |
| Male                                            | 9024 (53.3)            | 6057 (53.4)         | 0.885                |
| Female                                          | 7915 (46.7)            | 5294 (46.6)         |                      |
| Age, median (Q1; Q3), years                     | 73.0 (67.0;79.0)       | 74.0 (68.0;80.0)    | <0.001               |
| Ethnicity, n (col %)                            |                        |                     |                      |
| White                                           | 11748 (70.9)           | 7348 (66.6)         | <0.001               |
| Hispanic/Latino                                 | 1283 (7.7)             | 580 (5.3)           |                      |
| Asian                                           | 3244 (19.6)            | 2878 (26.1)         |                      |
| Black/Mixed/Other                               | 296 (1.8)              | 233 (2.1)           |                      |
| BMI, median (Q1; Q3), kg/m <sup>2</sup>         | 27.5 (24.4;31.2)       | 26.8 (23.9;30.7)    | <0.001               |
| Systolic blood pressure, median (Q1; Q3), mmHg  | 134.0<br>(120.0;147.0) | 133.0 (120.0;146.0) | 0.427                |
| Diastolic blood pressure, median (Q1; Q3), mmHg | 80.0 (70.0;90.0)       | 80.0 (70.0;88.0)    | <0.001               |
| Pulse, median (Q1; Q3), bpm                     | 85.0 (72.0;105.0)      | 84.0 (70.0;108.0)   | 0.528                |
| Type of atrial fibrillation, n (col %)          |                        |                     |                      |
| Permanent                                       | 2932 (17.3)            | 1380 (12.2)         | <0.001               |
| Persistent                                      | 2903 (17.1)            | 1854 (16.3)         |                      |
| Paroxysmal                                      | 3540 (20.9)            | 3597 (31.7)         |                      |
| Unclassified                                    | 7564 (44.7)            | 4520 (39.8)         |                      |
| Care setting specialty at diagnosis, n (col %)  |                        |                     |                      |
| Internal medicine/Neurology/Geriatrics          | 3759 (22.2)            | 2113 (18.6)         | <0.001               |
| Cardiology                                      | 10397 (61.4)           | 8063 (71.0)         |                      |

|                                                               |                 |                |        |
|---------------------------------------------------------------|-----------------|----------------|--------|
| Primary care/general practice                                 | 2783 (16.4)     | 1175 (10.4)    |        |
| Care setting location at diagnosis, n (col %)                 |                 |                |        |
| Hospital                                                      | 9829 (58.0)     | 5764 (50.8)    |        |
| Office/Anticoagulation clinic/Thrombosis centre               | 5082 (30.0)     | 4519 (39.8)    | <0.001 |
| Emergency room                                                | 2028 (12.0)     | 1068 (9.4)     |        |
| Medical history, n (col %)                                    |                 |                |        |
| Heart failure                                                 | 4544 (26.8)     | 2835 (25.0)    | <0.001 |
| Acute coronary syndrome                                       | 2050 (12.1)     | 1274 (11.3)    | 0.026  |
| Vascular disease                                              | 4770 (28.2)     | 2928 (25.8)    | <0.001 |
| Carotid occlusive disease                                     | 611 (3.6)       | 417 (3.7)      | 0.741  |
| VTE                                                           | 636 (3.8)       | 265 (2.3)      | <0.001 |
| Prior stroke/TIA/SE                                           | 2587 (15.3)     | 1592 (14.0)    | 0.004  |
| History of bleeding                                           | 310 (1.8)       | 243 (2.1)      | 0.063  |
| Hypertension                                                  | 14336 (84.7)    | 9334 (82.3)    | <0.001 |
| Hypercholesterolemia                                          | 7609 (46.1)     | 5179 (46.8)    | 0.0206 |
| Diabetes                                                      | 4847 (28.6)     | 2928 (25.8)    | <0.001 |
| Cirrhosis                                                     | 85 (0.5)        | 40 (0.4)       | 0.066  |
| Moderate to severe CKD                                        | 2242 (13.7)     | 1304 (11.8)    | <0.001 |
| Dementia                                                      | 196 (1.2)       | 244 (2.2)      | <0.001 |
| Heavy alcohol user, n (col %)                                 | 258 (1.8)       | 167 (1.8)      | 0.925  |
| Current smoker, n (col %)                                     | 1307 (8.4)      | 907 (8.8)      | 0.293  |
| Antiplatelet treatment, n (col %)                             | 4345 (25.7)     | 2235 (19.7)    | <0.001 |
| CHA <sub>2</sub> DS <sub>2</sub> -VASc score, median (Q1; Q3) | 4.0 (3.0;5.0)   | 4.0 (3.0;4.0)  | 0.003  |
| HAS-BLED score <sup>3</sup> , median (Q1; Q3)                 | 1.0 (1.0;2.0)   | 1.0 (1.0;2.0)  | <0.001 |
| GARFIELD-AF death score <sup>4</sup> , median (Q1; Q3)        | 6.0 (3.7; 10.0) | 4.8 (2.9; 8.1) | <0.001 |
| GARFIELD-AF stroke score <sup>5</sup> , median (Q1; Q3)       | 1.7 (1.3; 2.4)  | 1.4 (1.0; 2.0) | <0.001 |
| GARFIELD-AF bleeding score <sup>6</sup> , median (Q1; Q3)     | 2.3 (1.7; 3.2)  | 1.6 (1.2; 2.3) | <0.001 |

<sup>1</sup> This study analyzed initial treatment of AF patients, regardless of the AF type which might have been confirmed at later visits;

<sup>2</sup> Calculated using T-test or Wilcoxon-Mann-Whitney for continuous variables, as appropriate, and Chi-squared or Fisher's exact test for categorical variables, as appropriate;

<sup>3</sup> The risk factor 'Labile INRs' is not included in the HAS-BLED score as it is not collected at baseline. As a result, the maximum HAS-BLED score at baseline is 8 points (not 9).

<sup>4</sup> Denotes the expected probability of death within two years from enrolment.

<sup>5</sup> Denotes the expected probability of developing a non-hemorrhagic stroke/SE within two years from enrolment.

<sup>6</sup> Denotes the expected probability of developing a major bleeding within two years from enrolment.

AP: anti-platelet treatment, BMI: body mass index, CKD: chronic kidney disease, NOAC: non-vitamin K oral anticoagulant, OAC: oral anti-coagulant, SE: systemic embolism, TIA: transient ischemic attack, VTE: venous thromboembolism



**Table S3. Proportion (%) of patients in each country not on anticoagulant treatment at baseline, by cohort of enrolment**

| Country                 | Cohort 1<br>(2010-<br>2011) | Cohort 2<br>(2011-<br>2013) | Cohort 3<br>(2013-<br>2014) | Cohort 4<br>(2014-<br>2015) | Cohort 5<br>(2015-<br>2016) |
|-------------------------|-----------------------------|-----------------------------|-----------------------------|-----------------------------|-----------------------------|
| Argentina               | -                           | 37.40                       | 43.92                       | 37.28                       | 38.10                       |
| Australia               | 35.63                       | 46.15                       | 40.45                       | 29.13                       | 23.93                       |
| Austria                 | 30.25                       | 29.03                       | 25.00                       | 16.67                       | 19.67                       |
| Belgium                 | -                           | 20.25                       | 16.58                       | 12.88                       | 10.22                       |
| Brazil                  | 38.75                       | 41.01                       | 40.74                       | 44.12                       | 40.00                       |
| Canada                  | 31.75                       | 32.91                       | 29.34                       | 35.59                       | 28.37                       |
| Chile                   | -                           | 25.66                       | 15.07                       | 7.41                        | 9.17                        |
| China                   | 76.84                       | 77.58                       | 68.98                       | 64.12                       | 61.68                       |
| Czech Republic          | -                           | 26.65                       | 21.01                       | 22.60                       | 16.71                       |
| Denmark                 | 33.33                       | 27.01                       | 19.51                       | 17.39                       | 10.09                       |
| Egypt                   | -                           | -                           | -                           | 6.82                        | 11.00                       |
| Finland                 | 29.58                       | 26.36                       | 13.13                       | 12.5                        | 0.00                        |
| France                  | 23.48                       | 18.88                       | 22.68                       | 13.97                       | 20.17                       |
| Germany                 | 45.72                       | 37.36                       | 19.33                       | 15.62                       | 17.00                       |
| Hungary                 | -                           | 18.82                       | 13.54                       | 14.83                       | 14.92                       |
| India                   | -                           | 57.96                       | 62.45                       | 48.15                       | 69.35                       |
| Italy                   | 9.92                        | 11.63                       | 9.16                        | 13.23                       | 7.71                        |
| Japan                   | 32.34                       | 23.33                       | 17.37                       | 18.14                       | 18.18                       |
| Mexico                  | 60.74                       | 47.58                       | 35.48                       | 38.36                       | 38.75                       |
| Netherlands             | 10.71                       | 10.63                       | 5.64                        | 4.84                        | 2.56                        |
| Norway                  | 11.43                       | 1.82                        | 8.33                        | 13.04                       | 21.05                       |
| Poland                  | 33.99                       | 32.38                       | 21.69                       | 11.90                       | 10.73                       |
| Russia                  | -                           | 52.52                       | 46.48                       | 41.32                       | 35.75                       |
| Singapore               | -                           | 43.75                       | 37.04                       | 27.91                       | 33.73                       |
| South Africa            | -                           | 21.05                       | 27.84                       | 22.86                       | 16.08                       |
| South Korea             | 54.94                       | 42.74                       | 38.50                       | 25.61                       | 27.71                       |
| Spain                   | 25.84                       | 21.79                       | 22.53                       | 23.31                       | 15.72                       |
| Sweden                  | 36.49                       | 32.81                       | 19.91                       | 11.58                       | 9.59                        |
| Switzerland             | -                           | -                           | -                           | 9.52                        | 5.77                        |
| Thailand                | -                           | 38.52                       | 38.58                       | 43.29                       | 38.24                       |
| Turkey                  | -                           | -                           | -                           | 33.10                       | 27.24                       |
| Ukraine                 | -                           | 62.00                       | 51.34                       | 42.77                       | 42.70                       |
| United Arab<br>Emirates | -                           | -                           | 40.00                       | 43.00                       | 32.18                       |
| United Kingdom          | 40.32                       | 43.49                       | 38.50                       | 24.29                       | 24.07                       |
| United States           | -                           | -                           | 17.98                       | 27.13                       | 30.14                       |

**Table S4.** Components of the model predicting withholding of OAC in cohorts 3 to 5, recruited during the time when NOACs became widely available. Age and BMI are continuous. Their odds ratios illustrate the increased likelihood of withholding OAC for every five units increase (e.g., going from age 45 to 50, or age 80 to 85).

| Variable                                             | Wald Chi-square –<br>DF | Odds ratio (95%<br>CI) |
|------------------------------------------------------|-------------------------|------------------------|
| Country                                              | 1622                    |                        |
| <b>Type of AF (ref.:<br/>Permanent/Persistent)</b>   | 243                     |                        |
| Paroxysmal/New onset (unclassified)                  |                         | 1.76 (1.64-1.89)       |
| History of bleeding                                  | 186                     | 3.14 (2.67-3.70)       |
| <b>Care setting specialty (ref.:<br/>Cardiology)</b> | 120                     |                        |
| Internal Medicine/Neurology/Geriatrics               |                         | 1.39 (1.28-1.51)       |
| Primary care/GP                                      |                         | 1.70 (1.53-1.90)       |
| <b>Age, five-years increase</b>                      | 106                     |                        |
| Age up to 75                                         |                         | 0.94 (0.92-0.96)       |
| Age greater than 75                                  |                         | 1.22 (1.18-1.27)       |
| Vascular disease                                     | 83                      | 1.37 (1.28-1.47)       |
| <b>Cohort (ref.: Cohort 3, 2013-2014)</b>            | 73                      |                        |
| Cohort 4 (2014- 2015)                                |                         | 0.79 (0.74-0.85)       |
| Cohort 5 (2015 -2016)                                |                         | 0.74 (0.69-0.79)       |
| Prior stroke/TIA/SE                                  | 44                      | 0.73 (0.67-0.80)       |
| <b>Care setting location (ref.: Hospital)</b>        | 33                      |                        |
| Emergency room                                       |                         | 1.12 (1.01-1.25)       |
| Office/AC clinic/Thrombosis centre                   |                         | 0.80 (0.74-0.88)       |
| BMI, 5 kg/m <sup>2</sup> increase                    | 23                      | 0.93 (0.90-0.96)       |
| VTE                                                  | 19                      | 0.62 (0.50-0.76)       |

|                                         |    |                  |
|-----------------------------------------|----|------------------|
| Cirrhosis                               | 15 | 2.13 (1.47-3.08) |
| Hypertension                            | 14 | 0.86 (0.79-0.93) |
| Dementia                                | 13 | 1.50 (1.21-1.85) |
| Hypercholesterolemia                    | 6  | 0.92 (0.86-0.98) |
| Diabetes                                | 2  | 0.95 (0.88-1.02) |
| <b>Race/Ethnicity (ref.: Caucasian)</b> | 2  |                  |
| Hispanic/Latino                         |    | 1.19 (0.97-1.46) |
| Asian                                   |    | 1.27 (0.95-1.69) |
| Black/mixed/other                       |    | 1.03 (0.82-1.30) |

---

OAC: oral anticoagulation, AF: atrial fibrillation, BMI: body mass index, CKD: chronic kidney disease, GP: general practitioner, SE: systemic embolism, TIA: transient ischemic attack, VTE: venous thromboembolism
